# Supplementary material
Source: PubMed Central journal article supplement (PMC2234105)
Supplement: pnas_0709741105_2.pdf [file pnas_0709741105_2.pdf]

|         |                 |            |            |            |             |
|---------|-----------------|------------|------------|------------|-------------|
| Mm 5a   | 1462-VNIPRKEKDF | QGMLEYKRED | EQKLVKNLIL | ELKPR..... | GVAVNLIPLGL |
| Rn 5b   | 1455-VTVQRKEKDF | QGMLEYHKED | EALLIRNLVT | DLKP.....  | QMLSGTVPCL  |
| Hs 5c   | 1351-VHSSSGPKKY | LGMLOYKRED | EAKLIQNLIL | DLKP.....  | GVVNMIPGL   |
| Sc Myo2 | 1151-VNATQINEEL | YRLLEDTEIL | NQEITEGLLK | GFEVPDAGVA | IQLSKRDVVY  |
|         | (20):           | H1         | H2         |            |             |

|         |                  |            |            |            |            |
|---------|------------------|------------|------------|------------|------------|
| Mm 5a   | 1507-PAYILFMCVR  | HADYLNDQK  | VRSLLTSTIN | SIKKVLKCRG | ..DFETVSF  |
| Rn 5b   | 1499-PAYILYMCIR  | HADYTNDLQ  | VHSLLSSTIN | GIKKVLKCRG | ..EDFEMTSF |
| Hs 5c   | 1396-PAHILFMCVR  | YADSLNDANM | LKSLMNSTIN | GIKQVVKRHL | ..EDFEMLSF |
| Sc Myo2 | 1201-PARILIIIVLS | EMWRFGLTKQ | SESFLAQVLT | TIQKVVTQLK | GNDLIPSGVF |
|         | (71)             | H3         | H4         |            | H5         |

|         |                 |             |            |            |            |
|---------|-----------------|-------------|------------|------------|------------|
| Mm 5a   | 1555-WLSNT....C | RFLHCLKQYS  | GEEGFMKHNT | SRQNEHCLTN | FDLAEYRQVL |
| Rn 5b   | 1547-WLSNT....C | RLLHCLKQYS  | GDEGFMTQNT | AKQNEHCLKN | FDLTEYRQVL |
| Hs 5c   | 1444-WLSNT....C | HFLNCLKQYS  | GEFEFMKHNS | PQQNKCLNN  | FDLSEYRQIL |
| Sc Myo2 | 1251-WLANVRELYS | FVVVFALNSIL | TEETFKNGMT | DEEYKEYVVS | .LVTLKDDF  |
|         | (121)           | H5          |            |            | H6         |

|         |                 |             |            |            |             |
|---------|-----------------|-------------|------------|------------|-------------|
| Mm 5a   | 1601-SDLAIQIYQQ | LVRVLENILQ  | PMIVSGMLEH | ETIQGVSGVK | PTGLRKRSTSS |
| Rn 5b   | 1593-SDLAIQIYQQ | LKIKIAEGLLQ | PMIVSAMLN  | ESIQGLSGVR | PTGYRKRSSS  |
| Hs 5c   | 1490-SDVAIRIYHQ | FIIIMEKNIQ  | PIIVPGMLEY | ESLQGISGLK | PTGFRKRSSS  |
| Sc Myo2 | 1299-EALSYNIYNI | WLKKLQKQLQ  | KKAINAVVIS | ESLPGFSAGE | TSGFLNK...  |
|         | (169)           | H6          |            |            |             |

|         |                 |            |           |            |            |
|---------|-----------------|------------|-----------|------------|------------|
| Mm 5a   | 1651-IAD.EGTYTL | DSILRQLNSF | HSMVCQHGM | PELIKQVVKQ | MFYIVGAILL |
| Rn 5b   | 1643-MVDGENSYCL | EAIIRQMNF  | HTVLCQGLD | PEIILQVFKQ | LFYMLNAVTL |
| Hs 5c   | 1540-IDD.TDGYTM | TSVLQQLSYF | YTTMCQGLD | PELVRQAVKQ | LFFLIGAVTL |
| Sc Myo2 | 1346-IFANTEEYTM | DDILTFNFI  | YWCMSFHE  | NEVFHAVVTT | LLNYVDAICF |
|         | (216)           |            | H7        |            | H8         |

|         |                 |            |            |             |            |
|---------|-----------------|------------|------------|-------------|------------|
| Mm 5a   | 1700-NNLLLRKDMC | SWSKGMQIRY | NVSQLEEWLR | DKNLMNSGAK  | ETLEPLIQAA |
| Rn 5b   | 1693-NNLLLRKDAC | SWSTGMQLRY | NISQLEEWLR | GKNLQQS GAV | QTMEPLIQAA |
| Hs 5c   | 1589-NSLFLRKDMC | SCRKGMQIRC | NISYLEEWLK | DKNLQNSLAK  | ETLEPLSQAA |
| Sc Myo2 | 1396-NELIMKRNFL | SWKRGQLQNY | NVTRLEEWCK | THGLTDG..T  | ECLQHLIQTA |
|         | (266)           | H8         | H9         | H10         | H11        |

|         |                 |            |            |            |            |
|---------|-----------------|------------|------------|------------|------------|
| Mm 5a   | 1750-QLLQVKKKTD | DDAEAICSMC | NALTTAQIVK | VLNLYTPVNE | FEERVSVSFI |
| Rn 5b   | 1743-QLLQVKKKTD | EDAEAICSLC | TSLSTQQIVK | ILNLYTPLNG | FEERVTVSFI |
| Hs 5c   | 1639-WLLQVKKKTD | SDAKEIYERC | TSLSAVQIIK | ILNSYTPIDD | FEKRVTPSFV |
| Sc Myo2 | 1444-KLLQVRKYTI | EDIDILRGIC | YSLTPAQLQK | LISQYQ.VAD | YESPIPQEIL |
|         | (314)           | H11        | H12        |            | H13        |

|         |                 |            |            |            |            |
|---------|-----------------|------------|------------|------------|------------|
| Mm 5a   | 1800-RTIQMRLRDR | KDSPQLLMDA | K.....H    | IFPVTFPFNP | .....SSL   |
| Rn 5b   | 1793-RTIQAQLQER | SDPQQLLLDS | K.....H    | MFPVLPFNP  | .....SAL   |
| Hs 5c   | 1689-RKVQALLNSR | EDSSQLMLDT | K.....Y    | LFQVTFPFTP | .....SPH   |
| Sc Myo2 | 1493-RYVADIVKKE | AALSSSGNDS | KGHEHSSSIF | ITPETGPTD  | PFSLIKTRKF |
|         | (363)           | H13        |            |            | H14        |

|         |                 |            |            |         |  |
|---------|-----------------|------------|------------|---------|--|
| Mm 5a   | 1835-ALETIQIPAS | LGLGFIARV  | -1853      |         |  |
| Rn 5b   | 1828-TMDSIHIPAC | LNLEFLNEV  | -1846      |         |  |
| Hs 5c   | 1724-ALEMIQIPSS | FKLGFLNRL  | -1742      |         |  |
| Sc Myo2 | 1543-DQVEAYIPAW | LSLPSTKRIV | DLVAQQVVQD | GH-1574 |  |
|         | (414)           |            | H15        |         |  |
