# Supplementary material
Source: PubMed Central journal article supplement (PMC2234105)

**A**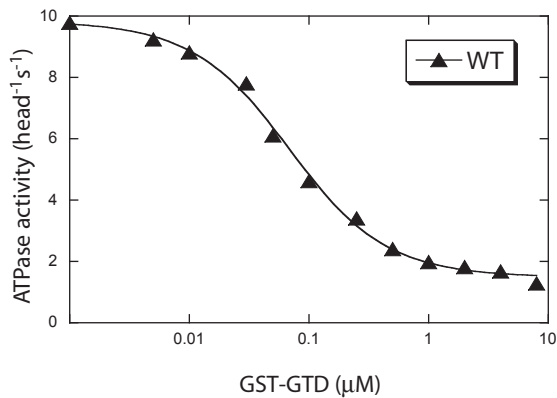**B**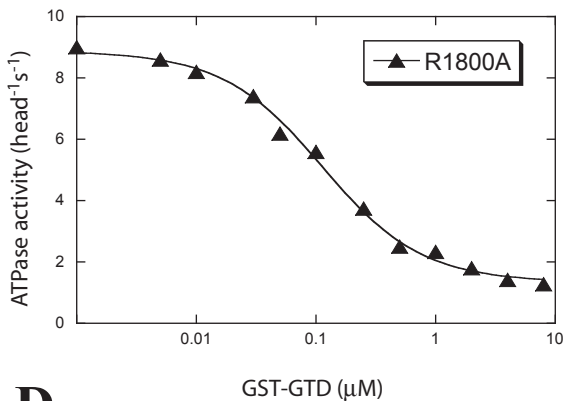**C**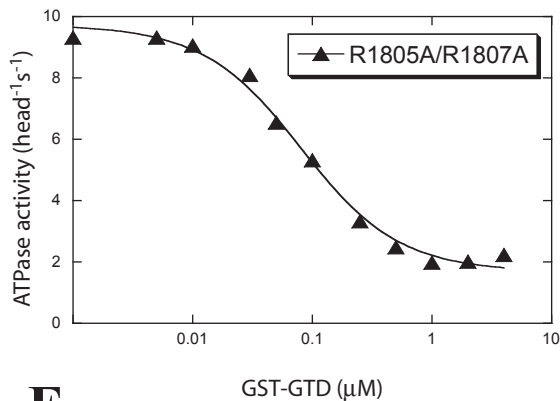**D**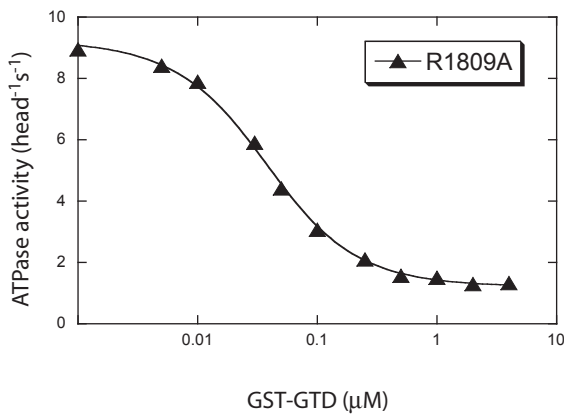**E**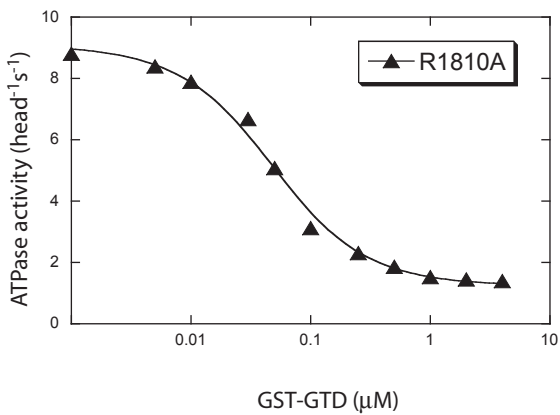

Supplement: pnas_0709741105_1.pdf [file pnas_0709741105_1.pdf]

**A**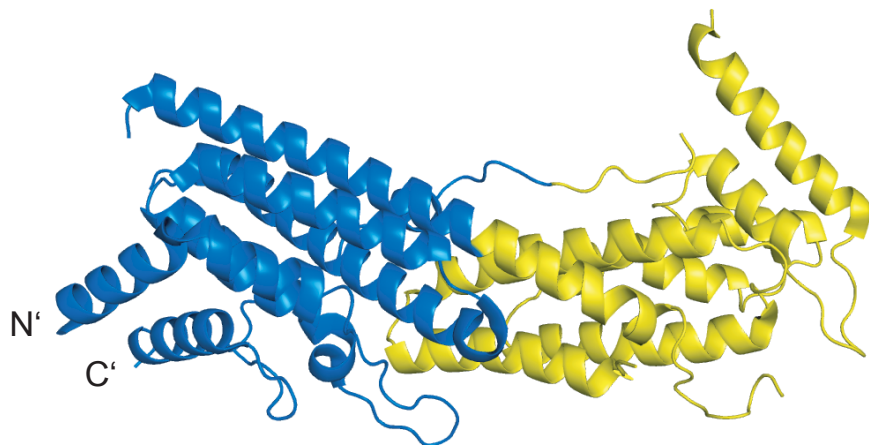**B**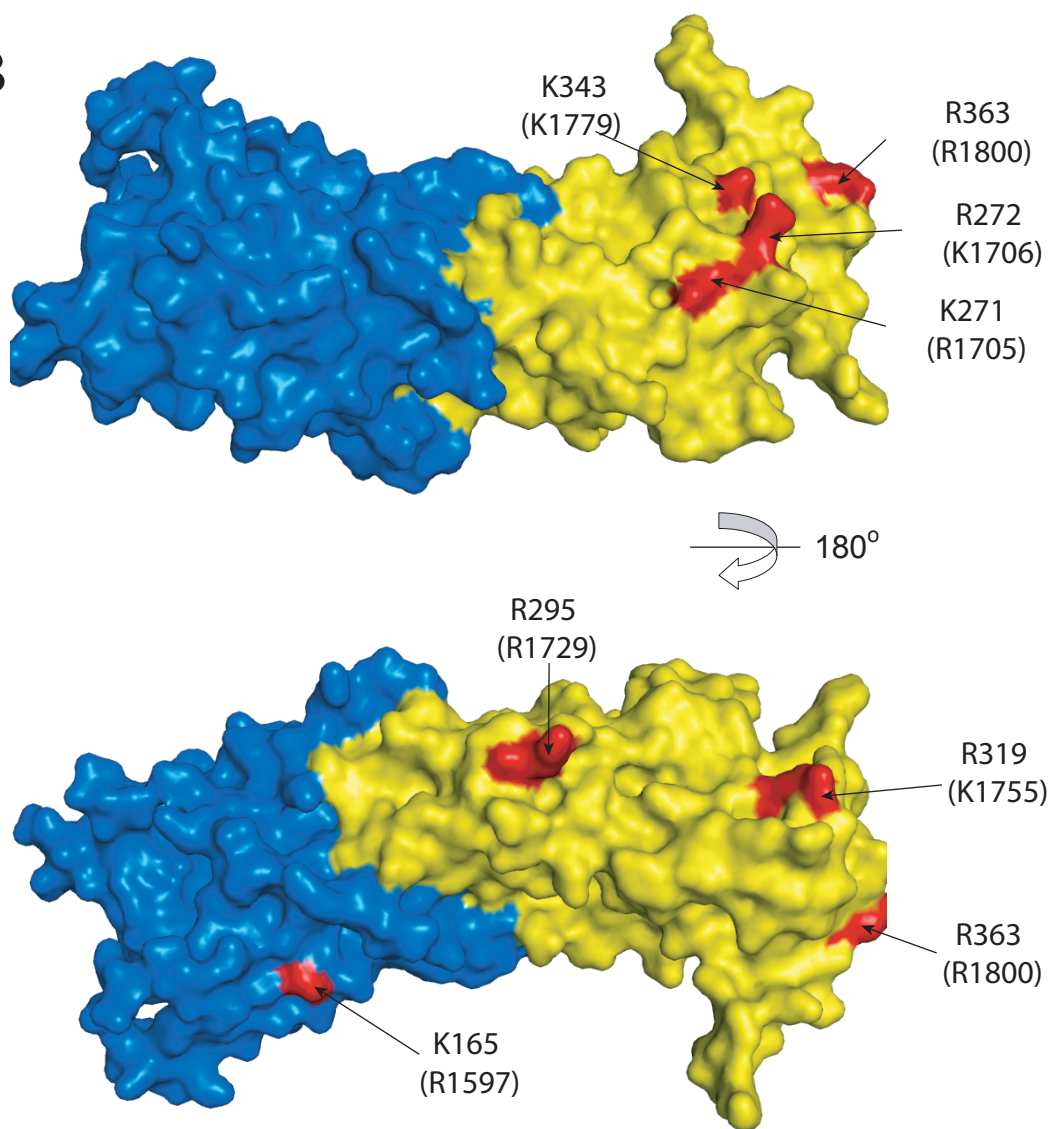

Supplement: pnas_0709741105_3.pdf [file pnas_0709741105_3.pdf]

Motor Domain

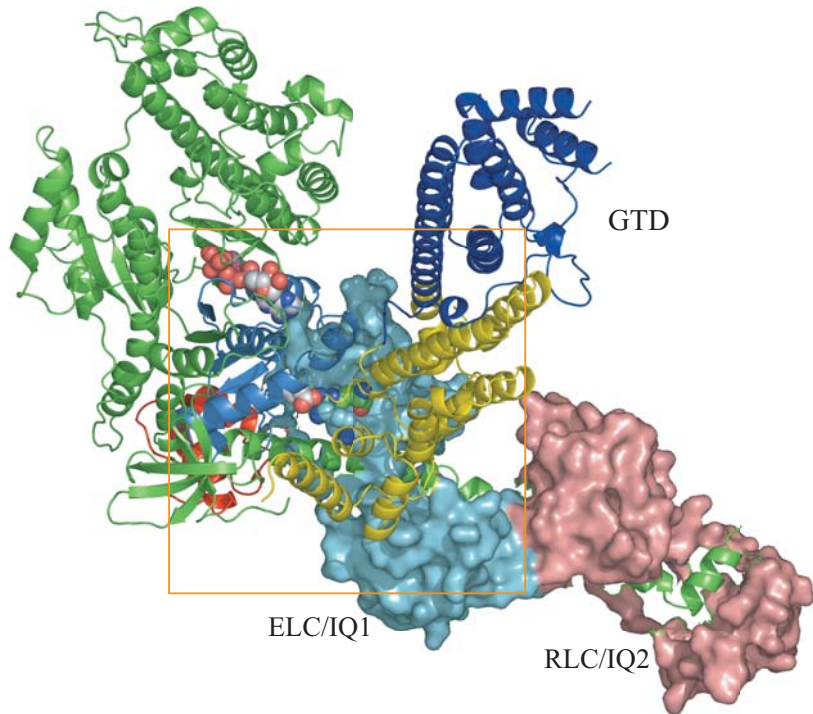

Mg ADP BeFx

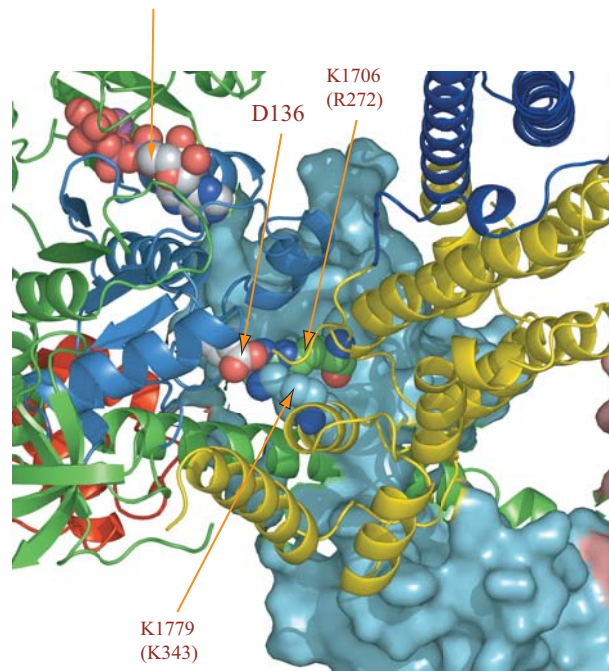

Supplement: pnas_0709741105_4.pdf [file pnas_0709741105_4.pdf]
